RESEARCH ARTICLE

# Effect of soil moisture on soil disintegration characteristics of different weathering profiles of collapsing gully in the hilly granitic region, South China

Dong Xia<sup>1</sup>✉, Bingqin Zhao<sup>2</sup>✉, Daxiang Liu<sup>2</sup>, Yusong Deng<sup>3</sup>, Hu Cheng<sup>1</sup>, Yujie Yan<sup>1</sup>, Shuwen Ding<sup>3</sup>, Chongfa Cai<sup>3</sup>\*

**1** Engineering Research Center of Eco-environment in Three Gorges Reservoir Region, Ministry of Education, College of hydraulic and environmental engineering, China Three Gorges University, Yichang, China, **2** College of Civil Engineering and Architecture, China Three Gorges University, Yichang, China, **3** College of Resources and Environment, Huazhong Agricultural University, Wuhan, China

✉ These authors contributed equally to this work.

\* [hzaucfcai@163.com](mailto:hzaucfcai@163.com)

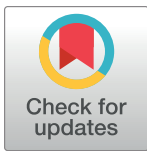

**OPEN ACCESS**

**Citation:** Xia D, Zhao B, Liu D, Deng Y, Cheng H, Yan Y, et al. (2018) Effect of soil moisture on soil disintegration characteristics of different weathering profiles of collapsing gully in the hilly granitic region, South China. PLoS ONE 13(12): e0209427. <https://doi.org/10.1371/journal.pone.0209427>

**Editor:** Jorge Paz-Ferreiro, RMIT University, AUSTRALIA

**Received:** May 16, 2018

**Accepted:** December 5, 2018

**Published:** December 31, 2018

**Copyright:** © 2018 Xia et al. This is an open access article distributed under the terms of the [Creative Commons Attribution License](https://creativecommons.org/licenses/by/4.0/), which permits unrestricted use, distribution, and reproduction in any medium, provided the original author and source are credited.

**Data Availability Statement:** All relevant data are within the paper and its Supporting Information files.

**Funding:** The publication of this paper was funded by the Changjiang River Scientific Research Institute of Changjiang Water Resources Commission Open Research Program (CKWV2016387/KY) for DX ([www.crsri.cn/index.asp](http://www.crsri.cn/index.asp)). The research of this paper was funded by the National Natural Science Foundation of China, No.

## Abstract

Collapsing gully erosion is the main important and specific soil erosion type in the red soil region of tropical and subtropical South China. Knowledge of the soil disintegration characteristics within different weathering profiles (surface layer, red soil layer, sandy soil layer and detritus layer) and its relationships with soil particle size distribution and soil properties is important in understanding the mechanism of the forming process and development of the collapsing gully. In this paper, we conducted an experiment on four collapsing gullies located four counties (Tongcheng County, Gan County, Anxi County and Wuhua County) in the hilly granitic region of southern China. The anti-disintegration ability of the different weathering profiles with two different moisture conditions (the air-dried condition and the natural state condition) were determined by the anti-disintegration index ( $K_c$ ) and measured by the submerging test. The results show that the coarse particles are higher in the sandy soil layer and the detritus layer of collapsing gully than that in the surface layer and the red soil layer, but the finer particles show the inversed order. The  $K_c$  values reduce significantly from the surface layer to the detritus layer. In the surface layer and the red soil layer, the  $K_c$  values in the natural state condition are much higher than that in the air-dried condition. The results highlight that, the sandy soil layer and the detritus layer are easily to disintegrate compare with the surface layer and the red soil layer, and in the case of low soil water content, the soil in any layer of collapsing gully is easy to disintegrate. The regression equation shows a very significant and positive relationship between the  $K_c$  values and the < 0.002 mm particles contents and the SOM (soil organic matter) ( $p < 0.01$ ), and negative relationship between the  $K_c$  values and the contents of other soil particle size. The results revealed that the repulsive force produced by compressed air in the soil exceeds the suction between the soil particles is the predominant factor to soil disintegrate rates in the air-dried state condition. Whereas the soil contained a certain amount of water can reduce the degree of disintegration. The results also indicated that the more contents of the cementation agents (like clay and SOM)

41601287 for DX, and No. 41630858 for CC ([www.nsf.gov.cn](http://www.nsf.gov.cn)). The funders had no role in study design, data collection and analysis, decision to publish, or preparation of the manuscript.

**Competing interests:** The authors have declared that no competing interests exist.

in the soil of the different layers of collapsing gully, the higher  $K_c$  values (it means the more difficult to disintegrate).

## Introduction

The collapsing gully erosion is the main important and specific soil erosion type in the red soil region of tropical and subtropical South China [1–9] (Fig 1). Especially, on the granitic weathered crust, the collapsing gully is most extensive [5, 6, 8–13]. The sediment and the damage caused by collapsing gully is far greater than that of surface erosion and gully erosion, which destroys land resources and ecological environment and reduces the quality of farmland [13–16]. According to the obvious differences in the degree of weathering, soil color, soil structure and soil particle size distribution characteristics, the granitic weathering crust (collapsing gully wall) (Fig 2) can be subdivided into five profiles: surface layer, red soil layer, sandy soil layer, detritus layer and bedrock, from top to bottom [11, 17–21]. The soil disintegration property is one of the major erosion characteristics [6, 11, 22]. So, to understand the soil disintegration property of the granite weathering crust (that is, the collapsing gully wall, Fig 2) will be the necessary condition for finding out the mechanism of the forming process and development of the collapsing gully.

The soil disintegration refers to the phenomenon that the soil is dispersed after being immersed in water. With the infiltration of water, the cementation between the soil particles is

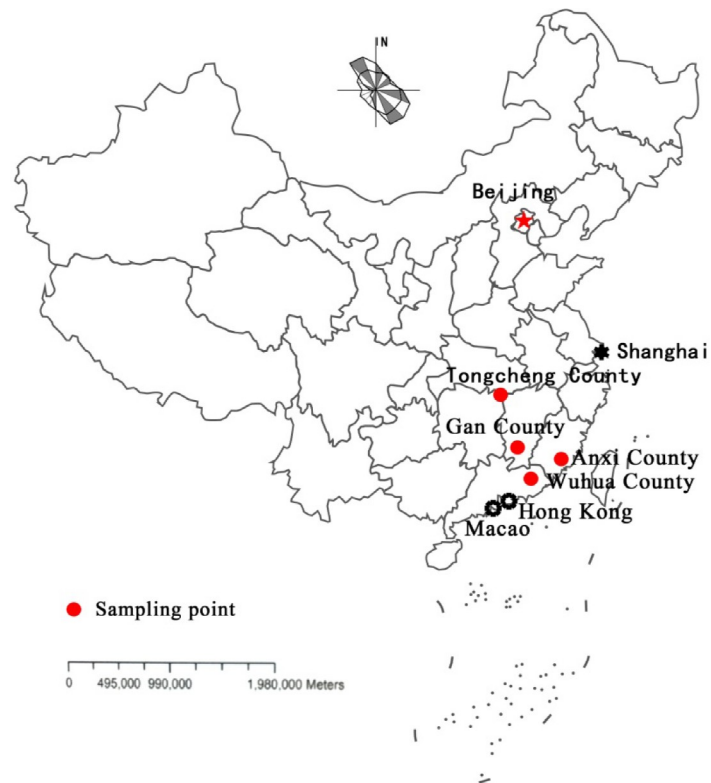

**Fig 1. The sketch map of sampling sites.** The sampling sites of Tongcheng county, Gan county, Anxi county and Wuhua county were represented by red dots on the China map. The representative cities, like Beijing, Shanghai, Hong Kong and Macao, were marked to reflect the relative positions of the sampling sites.

<https://doi.org/10.1371/journal.pone.0209427.g001>

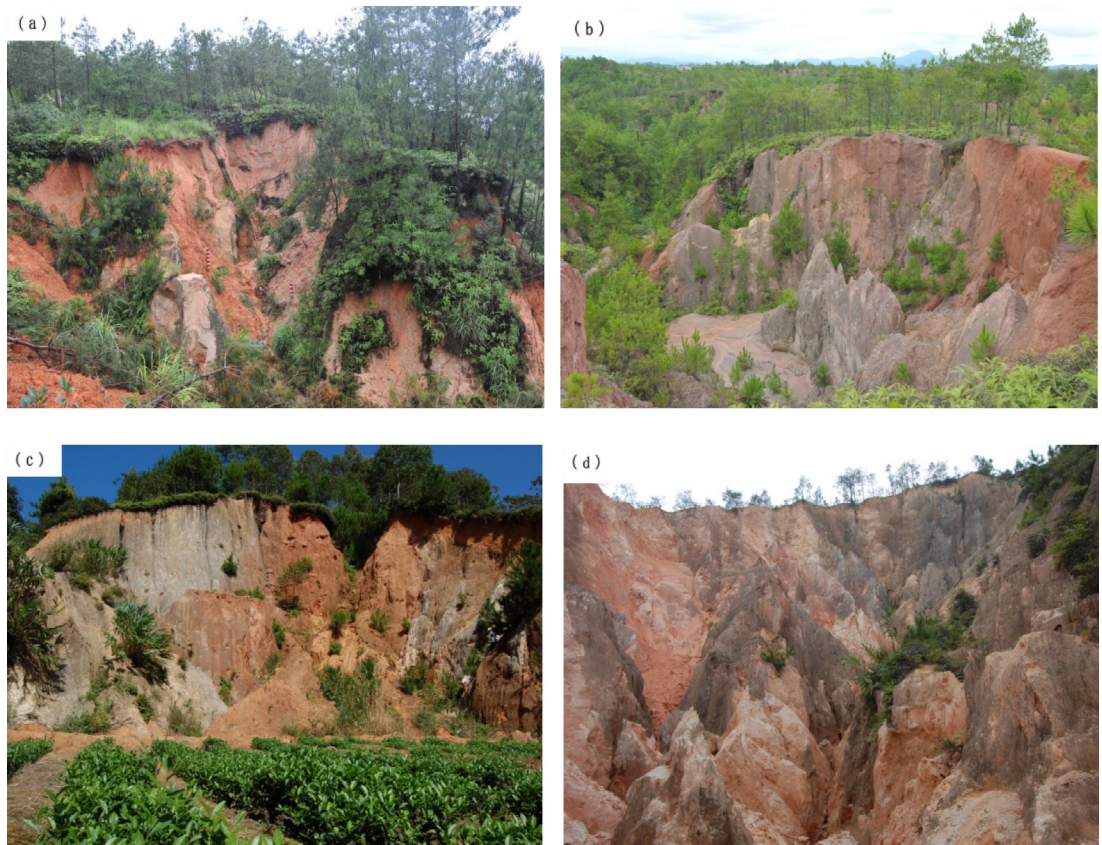

**Fig 2.** The typical collapse gully in the hilly granitic region (a: Tongcheng County; b: Gan County; c: Anxi County; d: Wuhua County) (photo: Dong Xia). The lowercase letters in the upper left corner of each Figure represented four collapsing gullies in the four counties, (a) Tongcheng County; (b) Gan County; (c) Anxi County; (d) Wuhua County.

<https://doi.org/10.1371/journal.pone.0209427.g002>

weakened, and the soil structure become unstable, therefore soil disintegration occurs [23]. At present, a series of studies have been carried out on the disintegration characteristics of granite weathering soil, and the causes of soil disintegration have been analyzed [24–29]. Research demonstrates that the disintegrating process is an irreversible physical process [30]. The soil disintegration is one of the important characteristics of some special soil, which is affected by many factors [24, 31–33]. A number of researchers studied the influential factors of soil disintegration and found that soil organic matter contents (SOM) [25, 34–35], soil cementing substance contents (such as  $\text{Ca}^{2+}$ ,  $\text{Fe}^{3+}$ , and  $\text{Al}^{3+}$ , oxides and hydroxides of Fe and Al) [36–38], soil moisture [24, 38–39], soil texture (especially the clay content) [34, 36], soil crack [28], and soil porosity [26, 37] played important roles in the soil structure stability, and then affected the soil disintegration. Experiments conducted by Lado et al. [40] showed that aggregate stability increased with an increase in clay content, due to the cementing effect of the clay in the soil. Gamble [41] indicated that the change of the soil water content was the causation of soil disintegration, and meanwhile the SOM content could affect the disintegration characteristics. Liu [29] found that the dissolved of the stabilizing agents in soil would result decrease in bound strength between particles, and soil disintegrate. Zhang et al. [24] also reported that the soil disintegration rate significantly correlated with soil moisture content, and it decreased with an increase in initial soil moisture content. Lan et al reported that the gas extrusion theory can be used to explain the disintegration mechanism [23].

The soil disintegration rate is one of the evaluation indexes of soil erosion, which can be used to reveal some of the causes of the collapsing gully erosion [40, 42]. In recent years, some important research results have been carried out on the disintegration properties of granite weathering soil or the collapsing gully wall. Based on the physicochemical properties and microstructure of the granite weathered soil, Li described the development mechanism of collapsing gully and analyzed its disintegration process [43]. Although several studies have focused on the soil structure softening damage [26], disintegrating process [23,27,30] and disintegrating rate [27,44] of the granite residual soil, few researches that investigate the variations of soil disintegration features associated with soil layers in the hilly granitic region of southern China have been published in recent years. There is a need for quantitative information on the soil disintegration characteristics within different weathering profiles and its relationships with soil particle size distribution and soil properties in order to understand the mechanism of the forming process and development of the collapsing gully.

In this paper, the relationships between soil anti-disintegration index ( $K_c$ ) and particle size distribution and SOM were analyzed based on the study of  $K_c$  in soils within the different soil layers (weathering profiles) of the four collapsing gullies (Figs 1 and 2). The objectives of this study are: 1) to evaluate the similarities and differences of the  $K_c$  of different soil layers of the four collapsing gullies located in different latitude; 2) to investigate the relationships between  $K_c$  and particle size distribution and SOM; 3) to explore the disintegration mechanism of different soil layers of collapsing gully under different soil moisture conditions.

## Materials and methods

### Collapsing gully sampling site selection

Four collapsing gullies in the four counties located in different latitude in the hilly granitic region, South China were selected according to the climate and geography conditions (Figs 1 and 2) [11]. Soils were sampled from the different weathering profiles of the four collapsing gullies in the four counties (Tongcheng County, Gan County, Anxi County and Wuhua County) (Figs 1 and 2). In this study, the counties' names were used to name the four collapsing gullies respectively. In the hilly granitic region in South China, it has a typical subtropics monsoon climate, and from north to south, it is with mean annual temperature from 17°C to 22°C and an average annual precipitation from 1350 mm to 1600 mm with high variability (the 75%-85% of the rain falls during March to September). According to statistics, the granite of the soil sampling site in the GX was formed in the Early Caledonian and Yanshanian, and the granites of the other three counties were formed in Yanshanian. In these regions, the granites are mostly coarse-grained granite and porphyritic granite, and mainly consist of feldspar and quartz [45–49]. So, there is no significant difference of the parent material of the granite. The other geological and geomorphological conditions, environmental and climate description of the study area please see the literature by Xia et al. [11] and Deng et al. [16].

### Soil sampling

The details of the soil sampling description of the four collapsing gullies can be see the literature by Xia et al. [11] and Deng et al. [16]. No specific permissions were required for the study area, for there were not a national park or other protected area of land, sea or wildlife. And the field studies did not involve endangered or protected species. The more than one hundred small soil blocks (diameter 3 to 5 cm) that obtained at each soil layer under one moisture content condition should meet the experiment repetition needs. In order to reduce the water content differences between the four collapsing gullies, the soil samples were obtained during a

Table 1. Description of different soil layers of the collapsing gullies.

| Soil layer         | Tongcheng County |                     | Gan County      |                     | Anxi County     |                     | Wuhua County    |                     |
|--------------------|------------------|---------------------|-----------------|---------------------|-----------------|---------------------|-----------------|---------------------|
|                    | Soil layer code  | Sampling height (m) | Soil layer code | Sampling height (m) | Soil layer code | Sampling height (m) | Soil layer code | Sampling height (m) |
| Surface soil layer | TC1              | 0–0.3               | GX1             | 0–0.3               | AX1             | 0–0.3               | WH1             | 0–0.3               |
| Red soil layer     | TC2              | 0.8                 | GX2             | 0.8                 | AX2             | 0.8                 | WH2             | 1                   |
|                    | TC3              | 2                   | GX3             | 1.8                 | AX3             | 2                   | WH3             | 2.5                 |
|                    | TC4              | 4                   | GX4             | 4                   | AX4             | 4                   |                 |                     |
| Sandy soil layer   | TC5              | 7                   | GX5             | 7.5                 | AX5             | 8                   | WH4             | 5                   |
|                    | TC6              | 9                   | GX6             | 9                   | AX6             | 10                  | WH5             | 9                   |
| Detritus layer     |                  |                     | GX7             | 11                  | AX7             | 12                  | WH6             | 11                  |
|                    |                  |                     | GX8             | 13.5                | AX8             | 15                  | WH7             | 14                  |
|                    |                  |                     |                 |                     |                 |                     | WH8             | 17                  |

<https://doi.org/10.1371/journal.pone.0209427.t001>

week without raining. The detailed descriptions of different soil layers and average moisture content are given in Table 1 and Table 2.

### Soil analysis and formula

The soil particle size distribution was determined using the pipette method [50]. The submerging test was used for determining the anti-disintegration ability of soil blocks with two different moisture conditions (the air-dried condition and the natural state condition). This method required the soil blocks to be immersed in water. Fifty small soil blocks (diameter 3 to 5 cm) from different weathering profiles of the four collapsing gullies were randomly selected in the two moisture conditions respectively and placed uniformly on a screen with aperture mesh of 2 mm, then lowered the screen gradually into water and recorded the time to count the number of the disintegration within a certain time [51]. The anti-disintegration index ( $K_c$ ) of soil is calculated according to the following formula [51–52]:

$$K_c = (a_1 \times 5 + a_2 \times 15 + a_3 \times 25 + \dots + a_{10} \times 95 + a_\infty \times 100) / 50 \quad (1)$$

The total immersion time is 10 minutes. The  $a_1, a_2, a_3 \dots a_{10}$  express the accumulative number of complete disintegration small soil blocks at the immersion times of 1 min, 2 min, 3 min. . . 10 min.  $a_\infty$  is the number of small soil blocks which remain not totally disintegrated after an immersion time of 10 min. At the beginning of the first 1 minute, the water stability of the small soil block is 0. At the end of the tenth 1 minute, the water stability of the small soil block is 100. Then the water stability of the total immersion time of 10 minutes can be

Table 2. Description of average moisture content ( $\text{kg kg}^{-1}$ ) of different soil layers with two different moisture conditions.

| Soil layer code | air-dried condition | natural state condition | Soil layer code | air-dried condition | natural state condition | Soil layer code | air-dried condition | natural state condition | Soil layer code | air-dried condition | natural state condition |
|-----------------|---------------------|-------------------------|-----------------|---------------------|-------------------------|-----------------|---------------------|-------------------------|-----------------|---------------------|-------------------------|
| TC1             | 0.085               | 0.240                   | GX1             | 0.054               | 0.206                   | AX1             | 0.039               | 0.184                   | WH1             | 0.040               | 0.161                   |
| TC2             | 0.046               | 0.193                   | GX2             | 0.041               | 0.189                   | AX2             | 0.044               | 0.256                   | WH2             | 0.033               | 0.165                   |
| TC3             | 0.087               | 0.248                   | GX3             | 0.029               | 0.208                   | AX3             | 0.038               | 0.198                   | WH3             | 0.040               | 0.151                   |
| TC4             | 0.078               | 0.204                   | GX4             | 0.045               | 0.205                   | AX4             | 0.030               | 0.247                   | WH4             | 0.037               | 0.171                   |
| TC5             | 0.054               | 0.202                   | GX5             | 0.037               | 0.246                   | AX5             | 0.034               | 0.173                   | WH5             | 0.034               | 0.145                   |
| TC6             | 0.070               | 0.223                   | GX6             | 0.018               | 0.221                   | AX6             | 0.052               | 0.245                   | WH6             | 0.043               | 0.173                   |
|                 |                     |                         | GX7             | 0.041               | 0.203                   | AX7             | 0.032               | 0.207                   | WH7             | 0.042               | 0.188                   |
|                 |                     |                         | GX8             | 0.035               | 0.244                   | AX8             | 0.039               | 0.214                   | WH8             | 0.047               | 0.190                   |

<https://doi.org/10.1371/journal.pone.0209427.t002>

represent as 0, 10, 20, 30. . . 100. The disintegration coefficient is an index to represent the anti-disintegration ability of small soil block in a period of time (1 minute). So we calculate the disintegration coefficient of the first 1 minute as  $5 = (0+10)/2$ . If the small soil block disintegrates during the immersion time of 1–2 min, its coefficient is defined as  $15 = [10+20]/2$ . If the small soil block never disintegrates during the total immersion time of 10 min, its coefficient is defined as 100 [51–52]. The average value of triplicate measurements was obtained to compute  $K_c$  of soil. The increase in  $K_c$  value indicates that the more difficult to disintegrate (that is, the lower the disintegrate rate).

### Statistical analysis

All statistical analyses were carried out using the SPSS 16.0 statistical software package for Windows (SPSS, Inc., Chicago, IL, USA). Regression analysis was used to analyze the relationship between anti-disintegration index ( $K_c$ ) and the contents of soil particles and soil organic matter. One-way analysis of variance (ANOVA) was used to test the differences of soil properties among soil layers. Differences at the  $p < 0.05$  level were considered significant. And significant differences were compared using the Fisher's least significant difference test (LSD) for each soil variable.

## Results

### Soil particle size distribution

As described in detail previously [11], there are noticeable differences in soil particle size distributions among the different soil layers of the four collapsing gullies. The predominant soil particle size is found to be clay ( $< 0.002$  mm) in the surface soil layer and the red soil layer, and it decline with the increasing depth. From surface layer to detritus layer, the sand particles (2.0–1.0 mm) in the TC and AX collapsing gully decrease firstly and then increase, but it roughly shows increase tend in the GX and WH collapsing gully. The contents of 1.0–0.25 mm particle in the TC, AX and WH show the falling tendency firstly and then increase from surface layer to detritus layer, but increases in the GX collapsing gully. The contents of 0.25–0.05 mm particle in the TC and GX increase firstly and then decrease from surface layer to detritus layer, but show the inversed order in the AX and WH. The 0.05–0.002 mm particle presents a fluctuated variation in the different soil layer of the four collapsing gullies. The detailed data please see the literature by Xia et al. [11].

### Soil anti-disintegration index ( $K_c$ )

The variations in  $K_c$  values of the different soil layers of the TC, GX, AX and WH collapsing gullies with two different moisture conditions are showed in the Fig 3. The  $K_c$  values reduce significantly from the surface layer to the detritus layer (from 91.5 to 20.3, 91.2 to 7.3, 93 to 13, 84.3 to 7, respectively, in the natural state condition; from 12.7 to 6.3, 16.7 to 5, 7.7 to 5, 19 to 5, respectively, in the air-dried condition), and these reveal that the detritus layer is the most prone to disintegration. The  $K_c$  values in the air-dried condition are lower than that in the natural state condition. Under the natural state condition, the  $K_c$  appear the peak value in the AX2 layer (96.7) and WH2 layer (90), respectively, and meanwhile the peak value of  $K_c$  appear in the GX2 layer (14.3), AX3 layer (25) and WH2 layer (35), respectively, with the air-dried condition (Fig 3). In the surface layer and the red soil layer, the  $K_c$  values in the natural state condition are much higher than that in the air-dried condition. And no significant difference about the  $K_c$  values is found between the two moisture conditions in the detritus layer. These results highlight that, in the case of low soil water content, the soil in any layer of collapsing

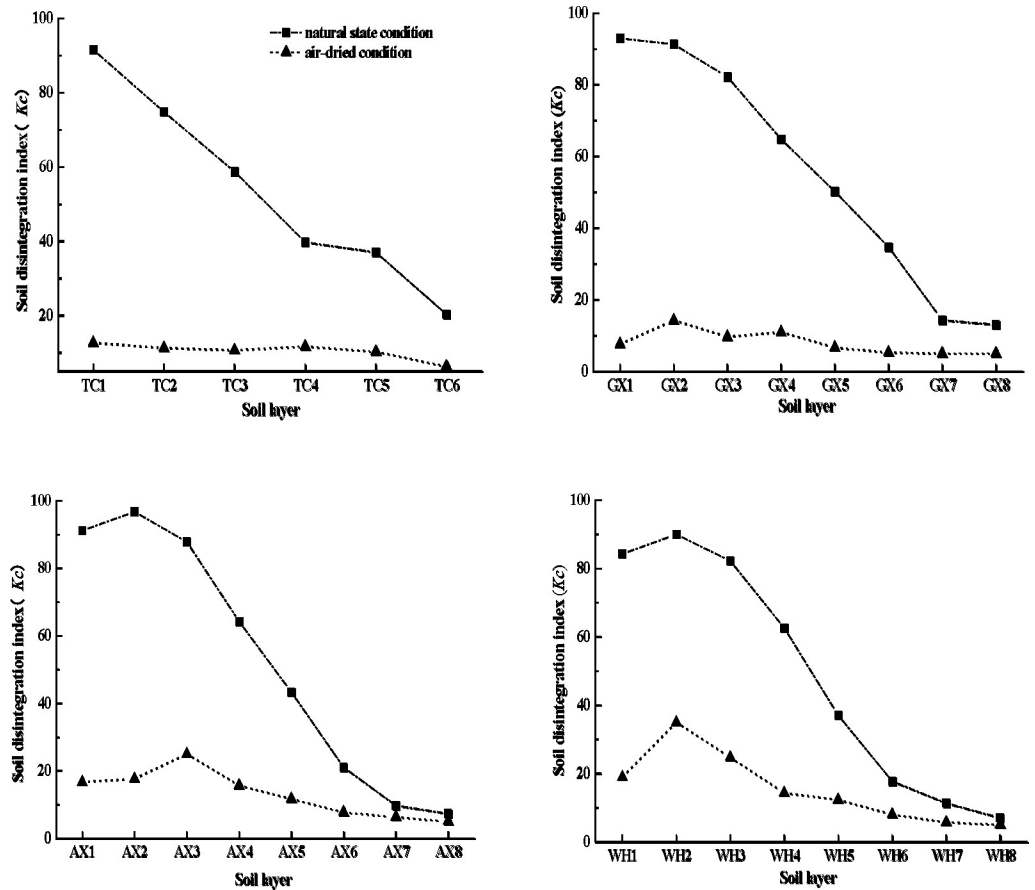

**Fig 3. Variations in  $K_c$  of the different soil layers of the TC, GX, AX and WH collapsing gullies with two different moisture conditions.** According to the  $K_c$  values change curves of the different soil layers of the TC, GX, AX and WH collapsing gullies with two different moisture conditions, the  $K_c$  values reduce significantly from the surface layer to the detritus layer. The  $K_c$  values in the air-dried condition are much lower than that in the natural state condition.

<https://doi.org/10.1371/journal.pone.0209427.g003>

gully is easy to disintegrate. Meanwhile, with natural state condition, there are high  $K_c$  values in the surface layer and the red soil layer, and it indicates that soil in these two layers is difficult to disintegrate. Our result is in agreement with the finding of Zhou and Li [28], who found that the sandy soil layer and the detritus layer had higher disintegration rates compare with the surface layer and the red soil layer.

### Correlations between the $K_c$ and the soil particle-size distribution and SOM

The early study of this experimental area [11] showed that the soil organic matter content was extremely low in the sandy soil layer and the detritus layer. The result is consistent with the studies about the distribution of soil organic matter in the different soil layers of the collapsing gullies in other experimental regions, which found that the soil organic matter contents sharply declined from the surface layer to the detritus layer [20, 28, 42]. Non-linear regression analyses were performed to determine the strength of relationships between  $K_c$  values and the contents of the different soil particle-size distribution under the two different moisture conditions (Fig 4), as well as the relationships between  $K_c$  values and the SOM (Fig 5), and they meet the logarithmic relationship or a power function relationship (Figs 4 and 5, Table 3). The

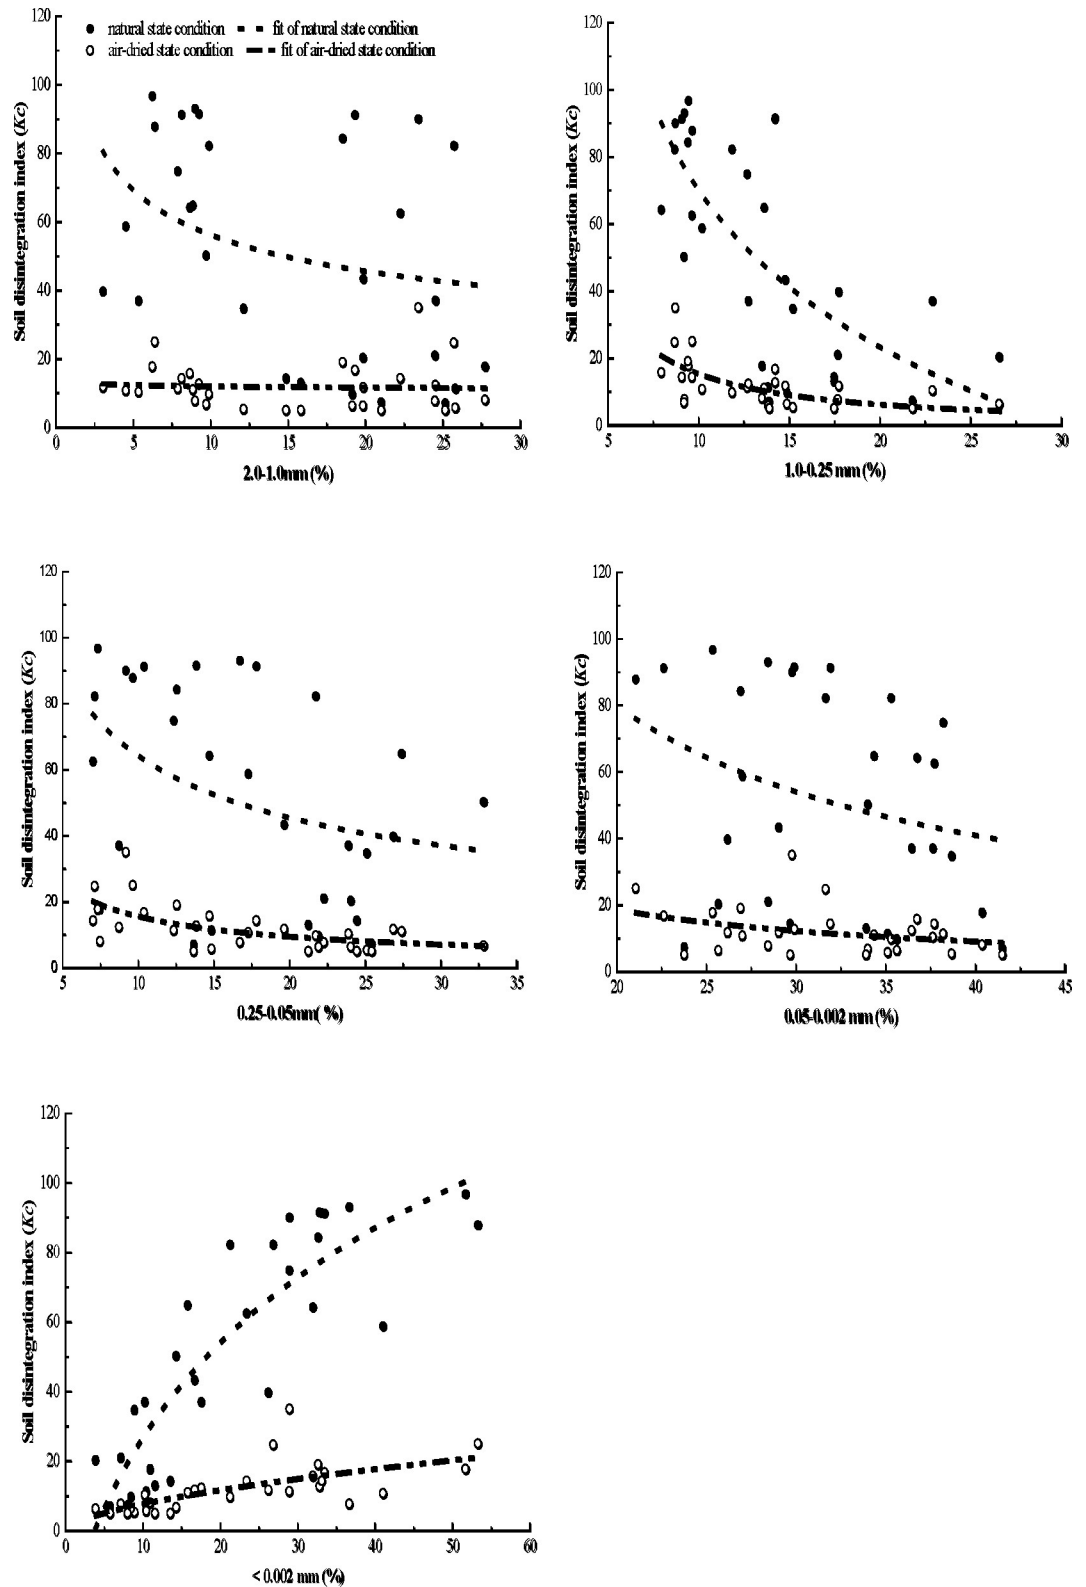

**Fig 4. Correlations between  $K_c$  and the contents of the different soil particle-size distribution under the two different moisture conditions.** Non-linear regression analyses results indicate that the  $K_c$  values had negative correlation with the 2.1–1.0 mm, 1.0–0.25 mm, 0.25–0.05 mm and 0.05–0.002 mm contents under the two different moisture conditions. But a very significant and positive relationship exists between the  $K_c$  values and the contents of < 0.002 mm.

<https://doi.org/10.1371/journal.pone.0209427.g004>



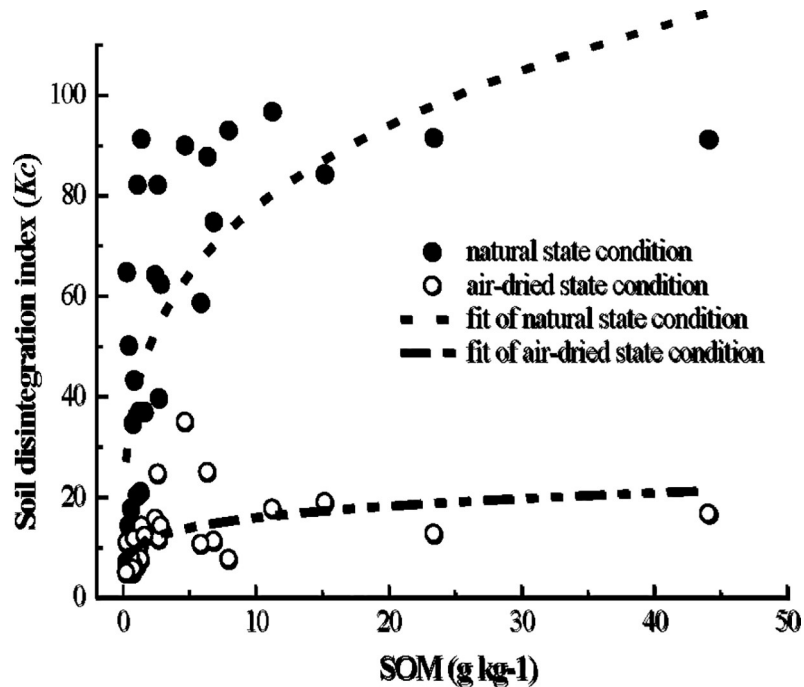

**Fig 5. Correlations between  $K_c$  and the SOM under the two different moisture conditions.** A highly significant and positive relationship exists between the  $K_c$  values and the SOM under the two different moisture conditions.

<https://doi.org/10.1371/journal.pone.0209427.g005>

results of regression analyses indicated that the  $K_c$  values had a weak negative correlation with the 2.0–1.0 mm and 0.05–0.002 mm contents under the two different moisture conditions (Table 3). Under the natural state condition, the results demonstrated a strong negative correlation with the contents of 1.0–0.25 mm ( $R^2 = 0.4435$ ,  $p < 0.01$ ) and a remarkable negative correlation with the contents of 0.25–0.05 mm ( $R^2 = 0.1419$ ,  $p < 0.05$ ) (Fig 4 and Table 3). Meanwhile a highly significant and negative relationship between the  $K_c$  values and the contents of 1.0–0.25 mm and 0.25–0.05 mm were found under the air-dried state condition ( $p < 0.01$ ,  $R^2 = 0.3754$  & 0.3500, respectively). The results of regression analyses also indicated that the contents of the  $< 0.002$  mm and the SOM played an important role in the soil disintegration. Under the two different moisture conditions, regression equation showed a very significant and positive relationship between the  $K_c$  values and the  $< 0.002$  mm and the SOM

**Table 3. Correlations between soil anti-disintegration index ( $K_c$ ) and soil particle-size distribution and SOM with two different moisture conditions.**

| Soil particle-size distribution(mm) | Natural state condition          |          | Air-dried state condition |          |
|-------------------------------------|----------------------------------|----------|---------------------------|----------|
|                                     | Regression equation              | $R^2$    | Regression equation       | $R^2$    |
| 2.0–1.0                             | $y = 112.55x^{-0.301}$           | 0.091    | $y = 13.27x^{-0.042}$     | 0.033    |
| 1.0–0.25                            | $y = 155.78 - 47.77\ln(x-3.99)$  | 0.4435** | $y = 309.36x^{-1.305}$    | 0.3754** |
| 0.25–0.05                           | $y = 202.47x^{-0.499}$           | 0.1419*  | $y = 81.37x^{-0.717}$     | 0.3500** |
| 0.05–0.002                          | $y = 1431.46x^{-0.963}$          | 0.0613   | $y = 418.49x^{-1.034}$    | 0.0763   |
| $< 0.002$                           | $y = -146.71 + 60.55\ln(x+7.57)$ | 0.7497** | $y = 1.965x^{0.5971}$     | 0.4149** |
| SOM                                 | $y = 41.63x^{0.272}$             | 0.4907** | $y = 10.22x^{0.194}$      | 0.2446** |

\*,  $P < 0.05$

\*\*\*,  $P < 0.01$

<https://doi.org/10.1371/journal.pone.0209427.t003>

( $p < 0.01$ ). The results show that the higher the contents of the  $< 0.002$  mm and the SOM, the more difficult the soil is to disintegrate, which are consistent with recent research findings [53–56].

## Discussion

### Effects of SOM on soil disintegration

SOM is an important factor affecting the formation of soil structure [57–59], as well as in the stabilization of soil aggregates [34, 60–65]. Generally, the level of aggregation and the stability of aggregates increase with increasing organic matter content [66–67]. Previous studies have suggested that the high organic content in soil is beneficial to the increase of soil anti-erodibility and decrease the disintegration of soil particles, which is of great significance to reduce erosion of soil [59, 63–64, 68].

Liu et al. [42] and Zhou and Li [28] indicated that the contents of SOM is closely related to the disintegration property of soil in the different soil layers, and the lower SOM contents in soil layer, the higher disintegration rate appeared. As well as, the results of Deng et al. [14] research showed that SOM can promote the formation of fine particles, subsequently the stability of soil aggregate enhanced. Previous studies revealed that SOM contents are extremely lower in the sandy soil layer and the detritus layer than that in the surface soil layer and the red soil layer [11], which is not conducive to the formation and stabilization of soil aggregate, and then cause high soil disintegration rate and low soil anti-erodibility [20]. In this study, compare with the surface soil layer and the red soil layer which have high SOM contents, the soil in the sandy soil layer and the detritus layer are more easily to disintegrate under the two different moisture conditions (Fig 5). The reason for this finding may be that SOM increase the stabilization and decrease the disintegrating speed of soil particles (Fig 5).

In soils, the inorganic stabilizing agents include mainly clays, polyvalent metal cations such as  $\text{Ca}^{2+}$ ,  $\text{Fe}^{3+}$ , and  $\text{Al}^{3+}$ , oxides and hydroxides of Fe and Al, calcium and magnesium carbonates and gypsum [38]. Researches indicate that free Fe and Al oxides play a role in soil cementation and are conducive to the stability of soil microstructure, meanwhile soil aggregates can be dispersed by  $\text{Na}^+$  and  $\text{K}^+$  [28, 36–38]. Other studies also show that the cementing effect of free Fe and Al oxides is important in soils with low organic matter content [37, 69]. Micro aggregates exhibit high stability when they are formed by binding of multivalent cations ( $\text{Ca}^{2+}$ ,  $\text{Fe}^{2+}$  and  $\text{Al}^{3+}$ ) and humus. Conversely, if micro aggregates are bound by the  $\text{Na}^+$  cations, or if there is a dispersion of clay particles, the soil structure becomes unstable [37–38, 70]. The studies of Zhang et al. [21] and Zhou and Li [28] indicate that the contents of free Fe and Al oxides in the surface soil layer and the red soil layer are higher than that in the sandy soil layer and the detritus layer, and the contents of  $\text{Na}^+$  and  $\text{K}^+$  cations have the opposite trend with free Fe and Al oxides. These results can also explain why the sandy soil layer and the detritus layer are more easily to disintegrate than the surface soil layer and the red soil layer to some extent.

### Effects of particle size distribution on soil disintegration

The hilly granitic region of tropical and subtropical South China is known for its thick granite weathering crust, with the minimum soil thickness being more than 20 m [23]. From the surface soil layer to bottom, the degree of weathering granite weathering crust decline with soil depth. In this sequence, the grain size becomes coarser, and the content of clay and organic matter decreases [5, 11, 18]. Our previous results show that the finer soil particles declined and the coarse soil particles increased with the declining of weathering degree (from the surface layer to the detritus layer) [11]. These results confirmed that the laterization and weathering

degree of parent material significantly affected the rock-soil characteristics of granite weathering crust [11, 18, 28].

Recent studies show that the higher the coarse grain content in the granite weathered soil, the more likely the soil will collapse, and the higher the fine particles content, especially the higher the clay content, the stronger the soil water stability will be. With the decrease of clay content, the disintegration rate of soil is accelerated [23, 29–30, 55–56, 71].

Considerable researches confirm that the clay content is beneficial to soil structure stability and soil aggregates water stability [12, 40, 72–73], which are also found in our research (Fig 4). Research of Deng et al. [12] suggested that the soil water stability and the soil structure stability decline from top layer to bottom of the collapsing gully wall. Clay particles are enriched in secondary minerals that generally possess a higher soil particle density than quartz material, which for many soils dominate the silt and especially the sand fraction [73]. Rühlmann et al. [72] found a similar trend with soil particle density decreasing for soils with increasing content of sand. Lado et al. [40] also demonstrate that the soil stability was increased in the soil have high clay content, because the clay enhances the cementation in the soil and reduce the disintegrating rate of soil. Our result in this paper is in agreement with the finding of Lado et al. [40].

The cohesive process between soil particles is very weak for the soil layer in the granite weathered crust (collapsing gully wall), which has the high sand content. And in the process of soil drying or saturating, the force between the soil particles further weakens and leads to soil instability and is prone to collapse in the case of touching water. Meanwhile, the more content of coarse particles, the easier to form large soil porosity which is conducive to water entry, thus causing the soil disintegration [29]. Given the above reasons, soil particle size distribution can affect soil disintegration rate of the different soil layer. Our results indicate that the sandy soil layer and the detritus layer of collapsing gully have the high coarse particles and low clay content, so both these two layers are easily to disintegrate under the two different moisture conditions (Fig 4).

### Effects of soil moisture condition on soil disintegration

The soil moisture content has important influence on the stability of soil aggregates and soil structure [28, 40, 74–75]. A recent study found that soil slaking occurs when the aggregate is exposed to stresses produced by differential swelling, entrapped air explosion, rapid release of heat during wetting, and the mechanical action of moving water [40]. The soil water correlates to the thickness of hydrated films surrounding the soil particles, namely the diffusion layer, which has effect on the suction among the soil particles [75]. This fact clearly indicates that the initial condition especially water content in unsaturated state can influence the behavior of unsaturated soils [76]. Meanwhile the increase of initial water content will decrease the effective void ratio, thereby narrowing the seepage space and weakening the intrusion effects [74–75]. Kim and Kim [76] found that the water content cannot influence the effective cohesion significantly at high suction levels (that is, the water content decreases). Xu et al. [75] also indicated that, in certain water content, the increase of initial soil moisture content can obviously strengthen the resistance ability of soil aggregates and reduce the degree of disintegration of aggregates.

This phenomenon can be attributed to a decrease in slaking forces when the soil contains a certain amount of water. The volume of air entrapped decreases with increasing soil antecedent water content, which result in lower compression forces acting on the aggregates during immersed under water and fast wetting [77]. Some studies suggested that fast wetting of the air-dried soil caused considerably more slaking compared with the moist soil [40, 74–75, 77]. Shi et al. [78] also indicated that soil slaking appeared to be the dominant breakdown

mechanism in initially dry soil and was particularly strong at the higher rainfall intensity. This can be explained that drying of the soil will increase the mechanical resistance to detachment and aggregate breakdown [77]. Meanwhile, unequal pressures caused by differential swelling during rewetting and the presence of entrapped air in pores also promote aggregate breakdown [79]. However, when the soil contains a certain amount of water, the initial soil water avoids entrapment of air and reduces spatial swelling differences, thereby increasing aggregate stability [77, 80].

Compare the  $K_c$  values of the same soil layer under the two different soil moisture conditions, it finds that the  $K_c$  values of the surface layer and the red soil layer in the natural state condition are much higher than that in the air-dried, but no significant difference about the  $K_c$  values are observed between the two different soil moisture conditions in the detritus layer (Fig 3). These results indicate that soil moisture significantly affects the soil disintegration characteristics of the surface layer and the red soil layer, but is not the dominant factor that affects the  $K_c$  values in the detritus layer between the two moisture conditions (the air-dried condition and the natural state condition). It also confirm that the same soil layer of the different collapsing gully has the similar soil disintegration characteristics, and in the case of low soil water content (the air-dried state condition), the soil in any layer of the four collapsing gullies is more easily to disintegrate compare with the natural state condition (Fig 3). These results are consistent with the results of Vermang et al. [77] and Bissonnais [80] that the initial soil water can increase soil aggregate stability and thereby decreasing the soil disintegrate. And these results are also in agreement with the finding of Zhou and Li [28] and Lado et al. [40] that the high coarse particles and low clay content is the dominant factor that affects the soil disintegration characteristics of the sandy soil layer, especially of the detritus layer. The overall trends of the  $K_c$  value of four different collapsing gullies are decreasing from the surface layer to the detritus soil layer under the two different moisture conditions. Thus the discussion of the relationship between the soil disintegration and the soil moisture of the same soil layer among two different moisture conditions can better reflect the influence of soil moisture on the  $K_c$  value.

### Analysis of disintegration characteristics of different soil layers of collapsing gully

Previous studies have suggested some explanations for the disintegration mechanism and influential factors of the collapsing gully soil as follow: a) the first is gas extrusion theory. Some researches indicated that a portion of the soil pores air was entrapped and compressed by the infiltrating water when the water entering the soil and infiltrating into the pores, thereby resulting an increasing in pressure of the pores air. Subsequently, soil disintegration occurs due to soil particles collapsed by entrapping air explosion and changing in soil structure (Fig 6). In generally, it is that the repulsive force produced by compressed air in the soil exceeds the suction between the soil particles [24–25, 80]. b) A portion of studies suggested that the essential reason for disintegration was softening damage. In the process of water absorbing, the inhomogeneity of soil particle size and pore size make the soil suction unbalance, and then lead to soil structure softening damage [26–27]. c) The stabilizing agents, such as  $\text{Ca}^{2+}$ ,  $\text{Fe}^{3+}$ , and  $\text{Al}^{3+}$ , oxides and hydroxides of Fe and Al, that play an important role in soil structure stability [26, 28–29]. In the meantime, due to the involvement of water, the water film between the soil particles are thickened, and then the suction between the soil particles can also be reduced, as a result, led to soil disintegrate [23, 81–82]. In addition, a new study also concluded that soil cracks also have an important influence on disintegration. Water can easily permeate into the soil through the cracks, therefore speeds up the contact between water and soil particles and then lead to soil disintegration [28].

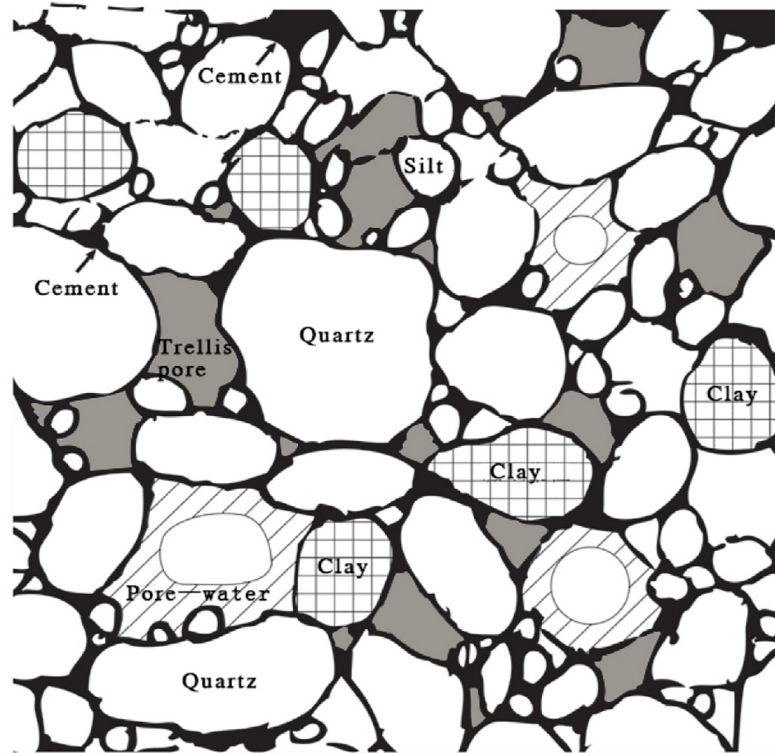

**Fig 6. Soil structure of granite residual soils [23].** The stable quartz grains compose soil as skeleton material, combining with other cementing materials and fine particulate matter in various ways, forming a unique soil structure of granite weathering crust (collapsing gully wall).

<https://doi.org/10.1371/journal.pone.0209427.g006>

In the soil layer of granite weathering crust, there are a certain amount of stable quartz grains, which compose soil as skeleton material, combining with other cementing materials and fine particulate matter in various ways, forming a unique soil structure of granite weathering crust (collapsing gully wall) [5–6, 22–23] (Fig 6). As described in detail previously, the coarse particles of the sandy soil layer and the detritus layer are higher than that in the surface layer and the red soil layer, but the finer particles show the inversed order [11]. Under the two different moisture conditions, the sandy soil layer and the detritus layer are easily to disintegrate compare with the surface layer and the red soil layer, whereas the  $K_c$  value of each soil layer in the air-dried condition was much lower than that in the natural state condition (Fig 3). The regression equations show a very significant and positive relationship between the  $K_c$  values and the contents of the  $< 0.002$  mm and the SOM ( $p < 0.01$ ) (Figs 3 and 4, Table 3). These results confirm that soil physic-chemical property, particle size distribution (especially the cementation agents, like soil organic matter, clay) and soil moisture contents are the dominant factors to influence the disintegration characteristics of the surface layer and the red soil layer of collapsing gully. And compared to soil physic-chemical property and particle size distribution, soil moisture content do not play a major role in affecting the disintegration characteristics of the sandy soil layer and the detritus layer.

Based on the results, the disintegration mechanism of different soil layers of collapsing gully is discussed.

1. Disintegration mechanism under different soil moisture conditions: In the air-dried condition, due to the evaporation of water, the water film thickness between the soil particles

declines, thereby the cementation between soil particles decreases, meanwhile the cracks increase. Under this condition, the pores in the soil are mostly occupied by the air, and the internal pore suction is much larger than that of the soil which contains certain water (in the natural condition). When these air-dry soils are immersed in water, a portion of the soil pores air is entrapped and compressed by the infiltrating water, subsequently, the entrapped air increases the pressure and slaking forces. Overall, the repulsive force produced by compressed air in the soil exceeds the suction between the soil particles, so the resultant rapid release of energy and unequal pressures cause considerable soil disintegration. In this paper, our results confirm that the  $K_c$  values of each soil layer in the air-dried condition of collapsing gully are much lower than that in the natural state condition (Fig 3). It means that the soil of collapsing gully with lower water content is more likely to disintegrate once touching water or rainfall.

2. Disintegration mechanism under different soil properties: The coarse particles in the sandy soil layer and the detritus layer are higher than that in the surface layer and the red soil layer. In the sandy soil layer and the detritus layer, the cohesive force between the soil particles decline due to low cementation agents (such as free Fe and Al oxides, SOM and clay, etc.), which lead the sandy soil layer and the detritus layer to be unstable structure soil. When the soil of the sandy soil layer and the detritus layer touch water or rainfall, the hydrated films surrounding the soil particles, namely the diffusion layer, have a weakening effect on the suction among the soil particles, subsequently, the soil disintegrate. Conversely, the surface layer and the red soil layer have the high values of cementation agents (especially the free Fe and Al oxides, SOM and clay content), so their stability are higher compare with the sandy soil layer and the detritus layer (that is, the surface layer and the red soil layer are not easily to disintegrate). Our research confirms this point, the  $K_c$  values of the surface layer and the red soil layer are higher than that of the sandy soil layer and the detritus layer both under the two moisture conditions (Fig 3). The results reveal that the sandy soil layer and the detritus layer are much easily to disintegrate than the surface soil layer and the red soil layer once touching water or rainfall.

## Conclusion

1. In general, in the sandy soil layer and the detritus layer of collapsing gully, the coarse particles are higher than that in the surface layer and the red soil layer, but the finer particles show the inversed order.
2. Under the two different moisture conditions, the sandy soil layer and the detritus layer are easily to disintegrate compare with the surface layer and the red soil layer, whereas in the air-dried condition, the  $K_c$  values of each soil layer are much lower than that in the natural state condition. The regression equations show a very significant and positive relationship between the  $K_c$  values and the contents of the  $< 0.002$  mm and the SOM ( $p < 0.01$ ), and negative relationship between the  $K_c$  values and the contents of other soil particle size. The results of regression analyses indicate that the contents of the  $< 0.002$  mm and the SOM play the important role in the soil disintegration of different soil layers of collapsing gully.
3. Based on the research under different soil moisture conditions and different soil properties, the disintegration mechanism of different soil layers of collapsing gully is discussed. In the air-dried state condition, when these air-dry soils are immersed in water, the repulsive force produced by compressed air in the soil exceeds the suction between the soil particles,

and this is the predominant factor leading to soil disintegrate. Whereas the soil contains a certain amount of water can reduce the degree of disintegration. That means, in the lower water content, the soil of collapsing gully is more likely to disintegrate once touching water or rainfall. And under different soil properties, the contents of cementation agents, clay and the SOM play the important role in the soil disintegration. The results show that the more contents of the cementation agents in the soil of the different layers of collapsing gully, the higher  $K_c$  values (the more difficult to disintegrate).

## Supporting information

**S1 Table. Soil particle size distribution and soil anti-disintegration index of different weathering profiles of the four collapsing gullies.**  
(XLSX)

## Acknowledgments

The authors are grateful to Da-guo Wu, Xin-zhen Qiu, Yue-zhong Shi, Jin-bo Xie, and Yi-jun He for their assistance in the field survey and laboratory analyses.

## Author Contributions

**Conceptualization:** Chongfa Cai.

**Data curation:** Dong Xia, Bingqin Zhao, Daxiang Liu.

**Formal analysis:** Hu Cheng, Shuwen Ding.

**Funding acquisition:** Dong Xia, Chongfa Cai.

**Investigation:** Bingqin Zhao, Daxiang Liu, Yusong Deng.

**Methodology:** Bingqin Zhao, Daxiang Liu, Yusong Deng, Hu Cheng, Yujie Yan.

**Project administration:** Dong Xia, Chongfa Cai.

**Resources:** Chongfa Cai.

**Software:** Hu Cheng, Yujie Yan, Shuwen Ding.

**Supervision:** Chongfa Cai.

**Validation:** Dong Xia, Bingqin Zhao, Chongfa Cai.

**Visualization:** Dong Xia, Bingqin Zhao.

**Writing – original draft:** Dong Xia, Bingqin Zhao.

**Writing – review & editing:** Dong Xia, Bingqin Zhao.

## References

1. Woo MK, Luk SH. Vegetation effects on soil and water losses on weathered granitic hillslopes, south China. *Phys. Geogr.* 1990; 1:1–16.
2. Xi CF. Better Land Use and Reclamation of the Red Soil Hilly Region of Southern China. *Geojournal.* 1990; 20: 365–368.
3. Zhu HJ. The present state and developmental orientation of land utilization in mountainous red earth regions in China—take Fujian Province. *Geojournal.* 1990; 20: 375–379.

4. Xu JX, Zeng GH. Benggang Erosion in Sub-tropical Granite Weathering Crust Geo-ecosystems: An Example from Guangdong Province. *Erosion, Debris Flows and Environment in Mountain Regions*, IAHS. 1992; 209: 455–463.
5. Xu JX. Benggang erosion: the influencing factors. *Catena*. 1996; 27: 249–263.
6. Luk SH, Woo MK. Soil erosion in South China. *Catena*. 1997; 29: 93–95.
7. Feng MH, Liao CY, Li SX, Lu SL. Investigation on status of hill collapsing and soil erosion in southern China. *Yangtze River*. 2009; 40: 66–68. (in Chinese)
8. Zhong B, Peng S, Zhang Q, Ma H, Cao S. Using an ecological economics approach to support the restoration of collapsing gullies in southern China. *Land Use Policy*. 2013; 32, 119–124.
9. Chen J. L., Zhou M., et al. Comparison of soil physicochemical properties and mineralogical compositions between noncollapsible soils and collapsed gullies. *Geoderma*. 2018; 317, 56–66.
10. Jiang F, Huang Y, Wang M, Lin J, Zhao G, Ge. H. Effects of rainfall intensity and slope gradient on steep colluvial deposit erosion in southeast China. *Soil Sci. Soc. Am. J.* 2014; 78: 1741–1752.
11. Xia D, Deng YS, Wang SL, Ding SW, Cai CF. Fractal features of soil particle size distribution of different weathering profiles of the collapsing gullies in the hilly granitic region, south China. *Nat. Hazards*. 2015; 79: 455–478.
12. Deng YS, Li SX, Ding SW, Cai CF, Xia D, Liu DL. Research on different soil layers of collapsing gully fractal characteristics and erosion characteristics in Tongcheng. *Resources and Environment in the Yangtze Basin*. 2016; 25: 63–70. (in Chinese)
13. Xia D, Ding SW, Long L, Deng YS, Wang QX, Wang SL, et al. Effects of collapsing gully erosion on soil qualities of farm fields in the hilly granitic region of South China. *J. Integr. Agr.* 2016; 15: 2873–2885.
14. Deng YS, Xia D, Cai CF, Ding SW. Effects of land uses on soil physic-chemical properties and erodibility in collapsing-gully alluvial fan of Anxi County, China. *J. Integr. Agr.* 2016; 15: 1863–1873.
15. Deng YS, Cai CF, Xia D, Ding SW, Chen JZ. Fractal features of soil particle size distribution under different land-use patterns in the alluvial fans of collapsing gullies in the hilly granitic region of southern China. *Plos One*. 2017; 12, e0173555. <https://doi.org/10.1371/journal.pone.0173555> PMID: 28301524
16. Deng YS, Cai CF, Xia D, Ding SW, Chen JZ, Wang TW. Soil atterberg limits of different weathering profiles of the collapsing gullies in the hilly granitic region of southern China. *Solid Earth*. 2017; 8: 1–35.
17. Shi DM. Soil erosion, soil conservation and ecosystems in the granitic regions of South China. *Soil Water Conserv. China*. 1985; 12: 6–10. (in Chinese)
18. Luk SH, Yao QY, Gao JQ, Zhang JQ, He YG, Huang SM. Environmental analysis of soil erosion in Guangdong Province: a Deqing case study. *Catena*. 1997; 29: 97–113.
19. Sheng JA, Liao AZ. Erosion control in south China. *Catena*. 1997; 29: 211–221.
20. Wang YZ, Hu YG, Li DQ, Yang SQ. The preliminary investigation of soil erosive factors in granitic weathering rinds in western Guangdong province. *Ecology Environ.* 2008; 17: 403–410. (in Chinese)
21. Zhang XM, Ding SW, Cai CF. Effects of drying and wetting on nonlinear decay of soil shear strength in slope disintegration erosion area. *Transactions of the Chinese Society of Agricultural Engineering*. 2012; 28: 241–245. (in Chinese)
22. Lan HX, Hu RL, Yue ZQ, Lee CF, Wang SJ. Engineering and geological characteristics of granite weathering profiles in South China. *J. Asian Earth Sci.* 2003; 21: 353–364.
23. Lan ZX. Experimental study on disintegration behavior of granite residual soil. Doctoral dissertation, South China Univ Techno, Guangzhou, China. 2013. (in Chinese)
24. Zhang S, Tang HM. Experimental study of disintegration mechanism for unsaturated granite residual soil. *Rock Soil Mech.* 2013; 34: 1668–1674. (in Chinese)
25. Groß AK, Cantrá S, Saathoff F. The applicability of disintegration tests for cohesive organic soils. *J. Environ. Eng. Landsc. Manage.* 2015; 23: 1–14.
26. Yan B, Tang LS, Hu H, Wang DZ, Lin GW. The mechanism of disintegration damage of granite weathered soil. *Hydrogeol. Eng. Geol.* 2009; 36: 68–71. (in Chinese)
27. Wu NS. A study on calving property and softening damage parameter of GRS. *J. Hebei Inst. Arch. Sci. Tech.* 2006; 23: 58–62. (in Chinese)
28. Zhou HY, Li HX. The study on soil disintegration characteristics and its influence factors of collapsing wall in the collapsing hill erosion region of Southern China. *J. Soil Water Conserv.* 2017; 31: 74–79. (in Chinese)
29. Liu DL, Zhao Y, Ding SW, Deng YS, Wang QX, Lv GA. Correlation between initial soil moisture content and the characteristics of collapsing gullies in granite regions. *Sci. Soil Water Conserv.* 2016; 14: 17–22. (in Chinese)



30. Zhang S. A study on disintegration behavior of granite residual soil in Guangzhou. Doctoral dissertation, China Univ Geosci, Wuhan, China. 2009. (in Chinese)
31. Chugh YP, Missavage RA. Effects of moisture on strata control in coal mines. *Eng. Geol.* 1981; 17: 241–255.
32. Zhang P, Tao K, Yang Z. Study on material composition and REE-host forms of ion-type RE deposits in South China. *J. Rare Earth.* 1995; 13: 37–41.
33. Vaisberg LA, Zarogatskii LP. Foundations of optimal mineral disintegration. *J. Mining Sci.* 2003; 39: 87–93.
34. Cantón Y, Solé-Benet A, Asensio C, Chamizo S, Puigdefábregas J. Aggregate stability in range sandy loam soils Relationships with runoff and erosion. *Catena.* 2009; 77: 192–199.
35. Ferro DA, Berti A, Francioso O, Ferrari E, Matthews GP, Morari F. Investigating the effects of wettability and pore size distribution on aggregate stability: the role of soil organic matter and the humic fraction. *Eur. J. Soil Sci.* 2012; 63: 152–164.
36. Levy GJ, Torrento JR. Clay dispersion and macroaggregate stability as affected by exchangeable potassium and sodium. *Soil Sci.* 1995; 160: 352–358.
37. Barral MT, Arias M, Guérif J. Effects of iron and organic matter on the porosity and structural stability of soil aggregates. *Soil Tillage Res.* 1998; 46: 261–272.
38. Amézqueta E. Soil Aggregate Stability: A Review. *J. Sustain. Agr.* 1999; 14: 2–3, 83–151.
39. Mbagwu JSC, Bazzoffi P. Soil characteristics related to resistance of breakdown of dry soil aggregates by water-drops. *Soil Till. Res.* 1998; 45: 133–145.
40. Lado M, Benhur M, Shainberg I. Soil wetting and texture effects on aggregate stability, seal formation, and erosion. *Soil Sci. Soc. Am. J.* 2004; 68: 1992–1999.
41. Gamble JC. Durability-plastic classification of shales and other Argillaceous Rock. Doctoral dissertation, UIUC, Urbana-Champaign, IL, USA. 1971.
42. Liu XL, Qiu JA, Zhang DL. Analysis of soil wetting mechanism and influencing factors on the headwall of collapsing and erosional gully. *J. Soil Water Conserv.* 2016; 30: 80–84. (in Chinese)
43. Li SP. A study on characteristic of Rock—soil and countermeasures of the collapse mound formation. *J. Soil Water Conserv.* 1992; 6: 29–35. (in Chinese)
44. Zeng P. A study on compaction characteristics and disintegration behavior of granite residual soil. Doctoral dissertation, South China Univ Techno, Guangzhou, China. 2012. (in Chinese)
45. Zhou XJ, Xia WS. Relationship of ancient-landform and modern erosion of granite areas in Southeast of China. *Science of Soil and Water Conservation.* 2004; 2(2):28–34. (in Chinese)
46. Ding SW, Cai CF, Zhang GY. A study on gravitational erosion and the formation of collapse mound in the granite area of Southeast Hubei. *Journal of Nanchang Institute of Technology.* 1995; (s1):50–54. (in Chinese)
47. Zhao J. Collapse of mound erosion and control method in Jiangxi Province. *China Water Resources.* 2006; 16:47–48. (in Chinese)
48. Ge HL, Huang YH, Jiang FS. Geologic and geomorphologic conditions for slope collapse occurrences in Fujian. *Bulletin of Soil and Water Conservation.* 2007; 27(2):128–131. (in Chinese)
49. Xie XK, Fan GX. The development law and countermeasures of collapse gully erosion about Wubei river watershed in Wuhua county, Guangdong province—A case study of Yinglongshan Mt. *Journal of Mountain Science.* 2010; 28(3):294–300. (in Chinese)
50. Gee GW, Bauder JW. Particle-size analysis. In: Klute A, et, al. (Ed.), *Methods of Soil Analysis Part 1, Physical and Mineralogical Methods*, 2nd ed.; ASA, Inc, Madison, WI, pp.1986; 383–411.
51. Liu J, Shi B, Jiang H, Bae S, Huang H. Improvement of water-stability of clay aggregates admixed with aqueous polymer soil stabilizers. *Catena.* 2009; 77: 175–179.
52. Liu J, Shi B, Jiang H, Huang H. Experimental study on the water-stability property of clay aggregates stabilized by STW polymer soil stabilizer. *Hydrogeology & Engineering Geology.* 2009; 36(2): 77–80. (in Chinese)
53. Mamedov AI, Beckmann S, Huang C, Levy GJ. Aggregate stability as affected by polyacrylamide molecular weight, soil texture, and water quality. *Soil Soc. Am. J.* 2007; 71: 1909–1918.
54. Barthès BG, Kouakoua E, Larré-Larrouy MC, Razafimbelo TM, Luca EFD, Azontonde A, et al. Texture and sesquioxide effects on water-stable aggregates and organic matter in some tropical soils. *Geoderma.* 2008; 143: 14–25.
55. Barik K, Canbolat MY, Yank R, Islam KR. Compressive behavior of soil as affected by aggregate size with different textures in turkey. *J. Anim. Plant Sc.* 2011, 21: 186–192.

56. Nciizah AD, Wakindiki II. Aggregate breakdown mechanisms as affected by soil texture and organic matter in soils dominated by primary minerals. *S. Afr. J. Plant Soil*. 2014; 31: 213–218.
57. Balabane M, Balesdent J. Input of fertilizer-derived labeled N to soil organic matter during a growing season of maize in the field. *Soil Biol. Biochem*. 1992; 24: 89–96.
58. Zhao SW, Su J, Yang YH, Liu NN, Wu JS, Shangguan ZP. A fractal method of estimating soil structure changes under different vegetations on Ziwuling Mountains of the Loess Plateau, China. *Agric. Sci. China*. 2006; 5: 530–538.
59. Shi Z.H, Yan FL, Li L, Li ZX, Cai CF. Inter-rill erosion from disturbed and undisturbed samples in relation to topsoil aggregates stability in red soils from subtropical China. *Catena*. 2010; 81: 240–248.
60. Castro-Filho C, Lourenço A, Guimaraes MF, Fonseca ICB. Aggregate stability under different soil management systems in a red latosol in the state of Parana, Brazil. *Soil Till. Res*. 2002; 65: 45–51.
61. Sarah P. Soil aggregation response to long- and short-term differences in rainfall amount under arid and Mediterranean climate conditions. *Geomorphology*. 2005; 70: 1–11.
62. Bissonnais YL, Blavet AD, Noni BGD, Laurent JY, Asseline BJ, Chenu C. Erodibility of Mediterranean vineyard soils: relevant aggregate stability methods and significant soil variables. *Eur. J. Soil Sci*. 2007; 58: 188–195.
63. Ding WF, Zhang XC. An evaluation on using soil aggregate stability as the indicator of interrill erodibility. *J. Mountain Sci*. 2016; 13: 831–843.
64. Annabi M, Raclot D, Bahri H, Bailly JS, Gomez C, Bissonnais YL. Spatial variability of soil aggregate stability at the scale of an agricultural region in Tunisia. *Catena*. 2017; 153: 157–167.
65. Nadeu E., de Vente J., et al. Exploring particle size distribution and organic carbon pools mobilized by different erosion processes at the catchment scale. *Journal of Soils and Sediments*. 2011; 11, 667–678.
66. Nie X, Li Z, Huang J, et al. Thermal stability of organic carbon in soil aggregates as affected by soil erosion and deposition. *Soil & Tillage Research*. 2018; 175:82–90.
67. Bronick CJ, Lal R. Soil structure and management: a review. *Geoderma*. 2005; 124: 3–22.
68. Li ZW, Nie XD, Chang XF, et al. Characteristics of Soil and Organic Carbon Loss Induced by Water Erosion on the Loess Plateau in China. *Plos One*. 2016; 11(4):e0154591. <https://doi.org/10.1371/journal.pone.0154591> PMID: 27124482
69. Six J, Feller C, Deneff K, Ogle SM, Moraes JC, Albrecht A. Soil organic matter, biota and aggregation in temperate and tropical soils—effects of no-tillage. *Agronomie*. 2002; 22: 755–775.
70. Jakšik O, Kodešová R, Kubiš A, Stehlíková I, Drábek O, Kapička A. Soil aggregate stability within morphologically diverse areas. *Catena*. 2015; 127: 287–299.
71. Zheng MZ, Jian WB, Wu MM. Reliability analysis of stability of granite residual soil slope. *Chin. J. Rock Mech. Eng*. 2005; 24: 5337–5340. (in Chinese)
72. Rühlmann J, Korschens M, Graefe J. A new approach to calculate the particle density of soils considering properties of the soil organic matter and the mineral matrix. *Geoderma*. 2006; 130: 272–283.
73. Schjønning P, McBride RA, Keller T, Obour PB. Predicting soil particle density from clay and soil organic matter contents. *Geoderma*. 2017; 286: 83–87.
74. Li XA, Huang RQ, Peng JB. Experimental research on disintegration of loess. *Chin. J. Rock. Mech. Eng*. 2009; 28: 3207–3207. (in Chinese)
75. Xu J, Tang Y, Zhou J. Effect of drying–wetting cycles on aggregate breakdown for yellow–brown earths in karst areas. *Geoenvironmental Disasters*. 2017; 4: 20.
76. Kim CK, Kim TH. Behavior of unsaturated weathered residual granite soil with initial water contents. *Eng. Geol*. 2010; 113: 1–10.
77. Vermang J, Demeyer V, Cornelis WM, Gabriels D. Aggregate stability and erosion response to antecedent water content of a loess soil. *Soil Sci. Soc. Am. J*. 2009; 73: 718–726.
78. Shi P, Thorlacius S, Keller T, Keller M, Schulin R. Soil aggregate breakdown in a field experiment with different rainfall intensities and initial soil water contents. *Eur. J. Soil Sci*. 2017; 68: 853–863.
79. Haynes RJ, Swift RS. Stability of soil aggregates in relation to organic constituents and soil water content. *Eur. J. Soil Sci*. 1990; 41: 73–83.
80. Bissonnais YL. Aggregate stability and assessment of soil crustability and erodibility. 1. Theory and methodology. *Eur. J. Soil Sci*. 1996; 47: 425–437.
81. Kemper WD, Rosenau RC, Dexter A.R. Cohesion development in disrupted soils as affected by clay and organic matter content and temperature. *Soil Sci. Soc. Am. J*. 1987; 51: 860–866.

82. Zhang XY, Fan HM, Yang XZ, Zhou LL, Wu M, Liu JZ. Effects of soil bulk density and water content on hydrostatic disintegration rate of sandy clay loam. *Acta. Pedologica Sinica*. 2013; 50: 214–218. (in Chinese)
